# Supplementary material
Source: PubMed Central journal article supplement (PMC3896177)
Supplement: 1321673111_pnas.201321673SI.pdf [file 1321673111_pnas.201321673SI.pdf]

# Supporting Information

Van Acker et al. 10.1073/pnas.1321673111

## SI Materials and Methods

**Materials.** Poplars (*Populus tremula* × *Populus alba* cv. “717–1B4”) transformed with the vectors pFS-CCR and pFAS-CCR have been described in Leplé et al. (1). Transgenic lines FS3, FS40, and FAS13 were used in this study.

**Belgian Field Trial.** The transgenic lines FS3 and FS40, and WT poplar (all in *P. tremula* × *P. alba* cv. “717–1B4”) were simultaneously micropropagated in vitro, and 120 ramets of each line were grown in the greenhouse. After 9 mo of growth, the stems were cut 10 cm above soil level. After 10 more days in the greenhouse, the coppiced trees were transferred to the field in May 2009, under a genetically modified field trial authorization (B/BE/07/V2) provided by the Belgian competent authorities after a positive ruling from the Belgian Biosafety Advisory Council. FS3 and FS40 correspond to the names WT52-3 and WT52-40 in the B/BE/07/2 document. The field consisted of six randomized blocks for each line, and each block consisting of 20 clonally propagated trees (Fig. S2A). Trees were planted in rows with alternating distance, 0.75 m and 1.5 m. In a single row, plants were planted 0.75 m from each other. A border of WT trees surrounded the field, but these plants were not included in the experimental analyses. The border trees were at least 2.5 m from the fence protecting the field. The height of the main stem and the diameter, just above the position of coppicing before planting, of every tree were measured in January 2010. After 10 mo of growth in the field, beginning of March 2010, the trees were coppiced. The bottom ~20 cm of the stems was harvested, debarked, and immediately photographed. Both stems and bark were stored at room temperature until used for further analyses. Pictures from the debarked, bottom ~20 cm of the stems were imported into Image J. Red-colored spots on the stem xylem were manually selected, and the surface was measured in squared pixels, as well as the total surface of the stem. Based on the percentage of surface that had a red coloration, individual stems were categorized into six different redness classes (class 0, fully white; class 1, 0–25% red; class 2, 25–50% red; class 3, 50–75% red; class 4, 75–100% red; and class 5, fully red).

**French Field Trial.** The transgenic lines FS3 and FAS13 as well as WT were simultaneously micropropagated in vitro, and 120 ramets of each line were grown in the greenhouse. They were planted in the field in July 2008, after obtaining suitable authorization (Application B/FR/07/06/01, Authorization 07/015 from the “Direction Générale de l’Alimentation” from the French “Ministère de l’Agriculture et de la Pêche” (on September 21, 2007 for a 5-y period) after a positive ruling from the French “Commission du Génie Biomoléculaire.” FS3 and FAS13 correspond to the names WT52-3 and WT62-13 in the B/FR/07/06/01 document. The 120 plants of each line were dispatched in five different randomized blocks (with 24 trees per block planted in two double rows) (Fig. S2B). The plant density was chosen according to short-rotation coppice practice: the space between trees of one double row was 0.55 m whereas the interspace between the two double rows was 1.5 m, and the planting distance within a row was 1 m. To prevent edge effects, the experimental plantation was bordered with one row of WT trees. During the growing season, the poplars were drip irrigated. In March 2010, the stems were coppiced. An ~20-cm segment at the base of each stem was harvested, debarked, and photographed.

**Saccharification of Greenhouse-Grown Samples.** FS3, FS40, and FAS13 transgenic trees were micropropagated in vitro and, along with WT, transferred to the greenhouse. After 6 mo of growth, the stems of five ramets of FS3, FS40, FAS13, and WT were cut 10 cm above soil level, debarked, left to air-dry, and ground to powder in liquid nitrogen. Another seven ramets of FAS13 and two WT were harvested and debarked. For the latter trees, red and white xylem of FAS13, located next to each other, as well as WT xylem, were scraped along the debarked stem with a scalpel and immediately frozen in liquid nitrogen. After grinding in liquid nitrogen, the scraped xylem of red and white zones and WT was dried under vacuum.

Biomass (10 mg) was saccharified without pretreatment and with acid pretreatment as described (2).

**Saccharification of Field-Grown Samples.** For the Belgian field trial, every transgenic tree belonging to redness class 3, 4, and 5 was saccharified, along with 18 WT (three randomly chosen trees from each of the six blocks). For the French field trial, the five most red trees for line FS3 and FAS13 were selected from each of the five blocks, together with five randomly chosen WT. The poplar samples, taken from the ~20-cm basal part of the harvested stems, were air dried and extensively ground and weighed with the iWALL custom-designed robot (Labman Automation Ltd.). The implementation of the iWALL system has been described in detail (3). The dilute base pretreatment solutions consisted of 6.25 mM NaOH and 62.5 mM NaOH. The dilute acid pretreatment solution was 0.4 M H<sub>2</sub>SO<sub>4</sub>, as described in detail (3).

For saccharifications including bark, wood and bark were ground separately and recombined based on the relative weight proportion of wood and bark in a stem. These saccharifications were performed as described (2).

**Simultaneous Saccharification and Fermentation.** Before pretreatment of biomass samples and the subsequent simultaneous saccharification and fermentation (SSF), total solids were determined with an automatic infrared moisture analyzer (Precisa XM60) according to the National Renewable Energy Laboratory procedure (4). Approximately 10 g of poplar biomass was pretreated with lime in the presence of water with a modified procedure from Chang et al. (5, 6); i.e., 10% (wt/vol) biomass was mixed with 1% (wt/vol) Ca(OH)<sub>2</sub> and incubated at 121 °C for 6 h. After pretreatment, samples were cooled to room temperature and collected by centrifugation at 89.44 × g for 3 min and washed three times with 2 mL of distilled water per gram dry biomass. The pretreated slurry was saccharified, fermented simultaneously at a substrate concentration of 8% (wt/wt), and mixed with 1% (wt/wt) yeast extract (DSM Food Specialties), 2% (wt/wt) bactopectone in 50 mM (pH 4.8) citrate buffer. The reaction mixture contained 0.3 g/g biomass Accellerase 1500 (Genencor International) and 0.1% (wt/wt) Ethanol Red dry alcohol yeast (Fermentis). The endoglucanase and β-glucosidase activity of Accellerase 1500 were between 2,200 and 2,800 carboxymethyl cellulose U/g and 450 and 775 *para*-nitrophenylglucose U/g, respectively. Before the addition of the yeast and the enzyme complex, the fermentation broth was autoclaved. Fermentations were run in capped bottles at 37 °C and shaken at 2.01 × g to prevent sedimentation of the substrate and the yeast.

The concentrations of glucose, cellobiose, and ethanol were determined on a Prostar HPLC system (Varian) with an Aminex HPX-87H column (Bio-Rad) at 65 °C, equipped with a 1-cm reversed-phase precolumn and with 5 mM H<sub>2</sub>SO<sub>4</sub> (0.6 mL/min)

as mobile phase. Detection was done on a differential refractive index detector (LaChrom L-7490; Merck).

**Wood Compositional Analysis.** Lignin content was determined using the acetyl bromide (7) and Klason (8) method, lignin composition by thioacidolysis (9, 10), crystalline cellulose content by the Updegraff method (11), and compositional analyses of the matrix polysaccharides by the alditol-acetate assay (11).

**Metabolomics.** The outer xylem of debarked stems was scraped with a scalpel, ground in liquid nitrogen, and extracted with 1 mL of methanol. To correct for the amount of plant material extracted, the pellet was dried, and the recalculated amount of MeOH, according to the dry weight measured, was subjected to solid-phase extraction. The eluate was lyophilized and dissolved in 50  $\mu$ l of water. An 8- $\mu$ l aliquot was subjected to liquid chromatography (LC)-mass spectrometry (MS) and LC-tandem MS with the Acquity ultraperformance LC system (Waters) connected to a Synapt High Definition Mass Spectrometry Q-TOF mass spectrometer (Waters). Gradient elution and MS analysis were performed as described (12). The data were recorded using Masslynx 4.1, and the data were statistically analyzed using ANOVA in TransOmics (Waters).

**Statistical Analyses.** For the Belgian field trial, first analyses of saccharification yield, diameter, and height were performed on WT trees and on transgenic trees belonging to redness class 3, 4, and 5. Because these redness classes are not present in WT, a new categorical variable was created encompassing the line and the redness class. Differences between the means of the transgenic lines of redness class 5 and the WT were estimated. Associated *P* values were adjusted with the Dunnett test (two-sided). Block and the interaction term block\*line were included as random factors. All other analyses were done on the best saccharifying trees. These analyses did not require the block\*line interaction term. Nested designs were used for those analyses where several measurements were done on the same plant. The nested term was

added as random term in the model. The significances of a random term were assessed with a likelihood ratio test.

The saccharification on the French field trial was performed at one time point on all individual trees. A mixed model was fitted with line, pretreatment condition, and line\*pretreatment as fixed effects. The random terms block, block\*line, and the nested term were not significant at the 0.05 significance level. Differences were estimated within each line between each pretreatment condition and the control treatment (= none), and within each pretreatment condition between the transgenic lines and WT. *P* values associated with these estimates were adjusted by using the linear step-up method of Benjamini and Hochberg (13). Other analyses were done on pools of five trees, two pools per block. These pools were considered as a random factor nested within line and block. All random effects were assumed to be normally distributed. For these analyses, there was only one fixed term: line. Differences between the means of the transgenic lines and the WT line were estimated. Associated *P* values were adjusted with the Dunnett test (two-sided).

In analyses, such as some saccharification analyses and all fermentation analyses, multiple observations over time were taken. These data were analyzed as repeated-measurements data. For all models, five covariance structures were fitted to the data: unstructured, autoregressive, heterogeneous autoregressive, compound symmetry, and heterogeneous Toeplitz. Time was considered as a classification variable, unless line plots gave indications for a linear spline model. Fixed effects were line, time, and time\*line. All random effects were assumed to be normally distributed. Observations on different plants were assumed to be independent. Variances and covariances of measures on a single plant were assumed to be the same within each line. Differences between the means of the transgenic lines and WT were estimated at particular times. Associated *P* values were adjusted by using the linear step-up method (13). Residual analysis was carefully examined.

The output of all analyses was generated using SAS/STAT software, Version 9.3 of the SAS System for windows (2011, SAS Institute).

1. Leplé J-C, et al. (2007) Downregulation of cinnamoyl-coenzyme A reductase in poplar: Multiple-level phenotyping reveals effects on cell wall polymer metabolism and structure. *Plant Cell* 19(11):3669–3691.
2. Van Acker R, et al. (2013) Lignin biosynthesis perturbations affect secondary cell wall composition and saccharification yield in *Arabidopsis thaliana*. *Biotechnol Biofuels* 6:46.
3. Santoro N, et al. (2010) A high-throughput platform for screening milligram quantities of plant biomass for lignocellulose digestibility. *Bioenerg Res* 3(1):93–102.
4. Sluiter A, et al. (2008) *Determination of Total Solids in Biomass and Total Dissolved Solids in Liquid Process Samples: Laboratory Analytical Procedure (LAP)* (National Renewable Energy Laboratory, Golden CO), Technical Report NREL/TP-510-42621.
5. Chang VS, Kaar WE, Burr B, Holtzapple MT (2001) Simultaneous saccharification and fermentation of lime-treated biomass. *Biotechnol Lett* 23(16):1327–1333.
6. Chang VS, Nagwani M, Kim C-H, Holtzapple MT (2001) Oxidative lime pretreatment of high-lignin biomass. *Appl Biochem Biotechnol* 94(1):1–28.
7. Foster CE, Martin TM, Pauly M (2010) Comprehensive compositional analysis of plant cell walls (lignocellulosic biomass). Part I: Lignin. *J Vis Exp* 37:e1745.
8. Dence CW (1992) *Methods in Lignin Chemistry*, eds Lin SY, Dence CW (Springer, Berlin), pp 33–61.
9. Ralph J, et al. (2008) Identification of the structure and origin of a thioacidolysis marker compound for ferulic acid incorporation into angiosperm lignins (and an indicator for cinnamoyl CoA reductase deficiency). *Plant J* 53(2):368–379.
10. Yue F, Lu F, Sun R-C, Ralph J (2012) Syntheses of lignin-derived thioacidolysis monomers and their uses as quantitation standards. *J Agric Food Chem* 60(4): 922–928.
11. Foster CE, Martin TM, Pauly M (2010) Comprehensive compositional analysis of plant cell walls (lignocellulosic biomass). Part II: Carbohydrates. *J Vis Exp* 37:e1837.
12. Grunewald W, et al. (2012) Transcription factor WRKY23 assists auxin distribution patterns during *Arabidopsis* root development through local control on flavonol biosynthesis. *Proc Natl Acad Sci USA* 109(5):1554–1559.
13. Benjamini Y, Hochberg Y (1995) Controlling the false discovery rate: A practical and powerful approach to multiple testing. *J R Stat Soc Series B Stat Methodol* 57(1): 289–300.

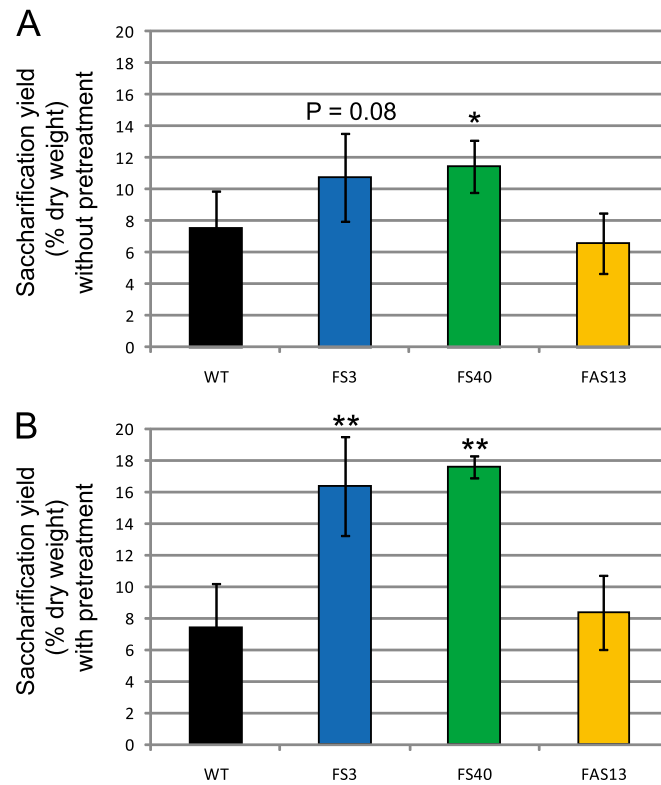

**Fig. S1.** Saccharification yields of greenhouse-grown transgenic trees. Saccharification yield (expressed as % dry weight) of greenhouse-grown debarked wood from FAS13, FS3, FS40, and WT ( $n = 5$ ) after 48 h of saccharification (A) without pretreatment and (B) with acid pretreatment. Error bars represent SDs.  $*0.01 < P < 0.05$ ;  $**P < 0.01$ .







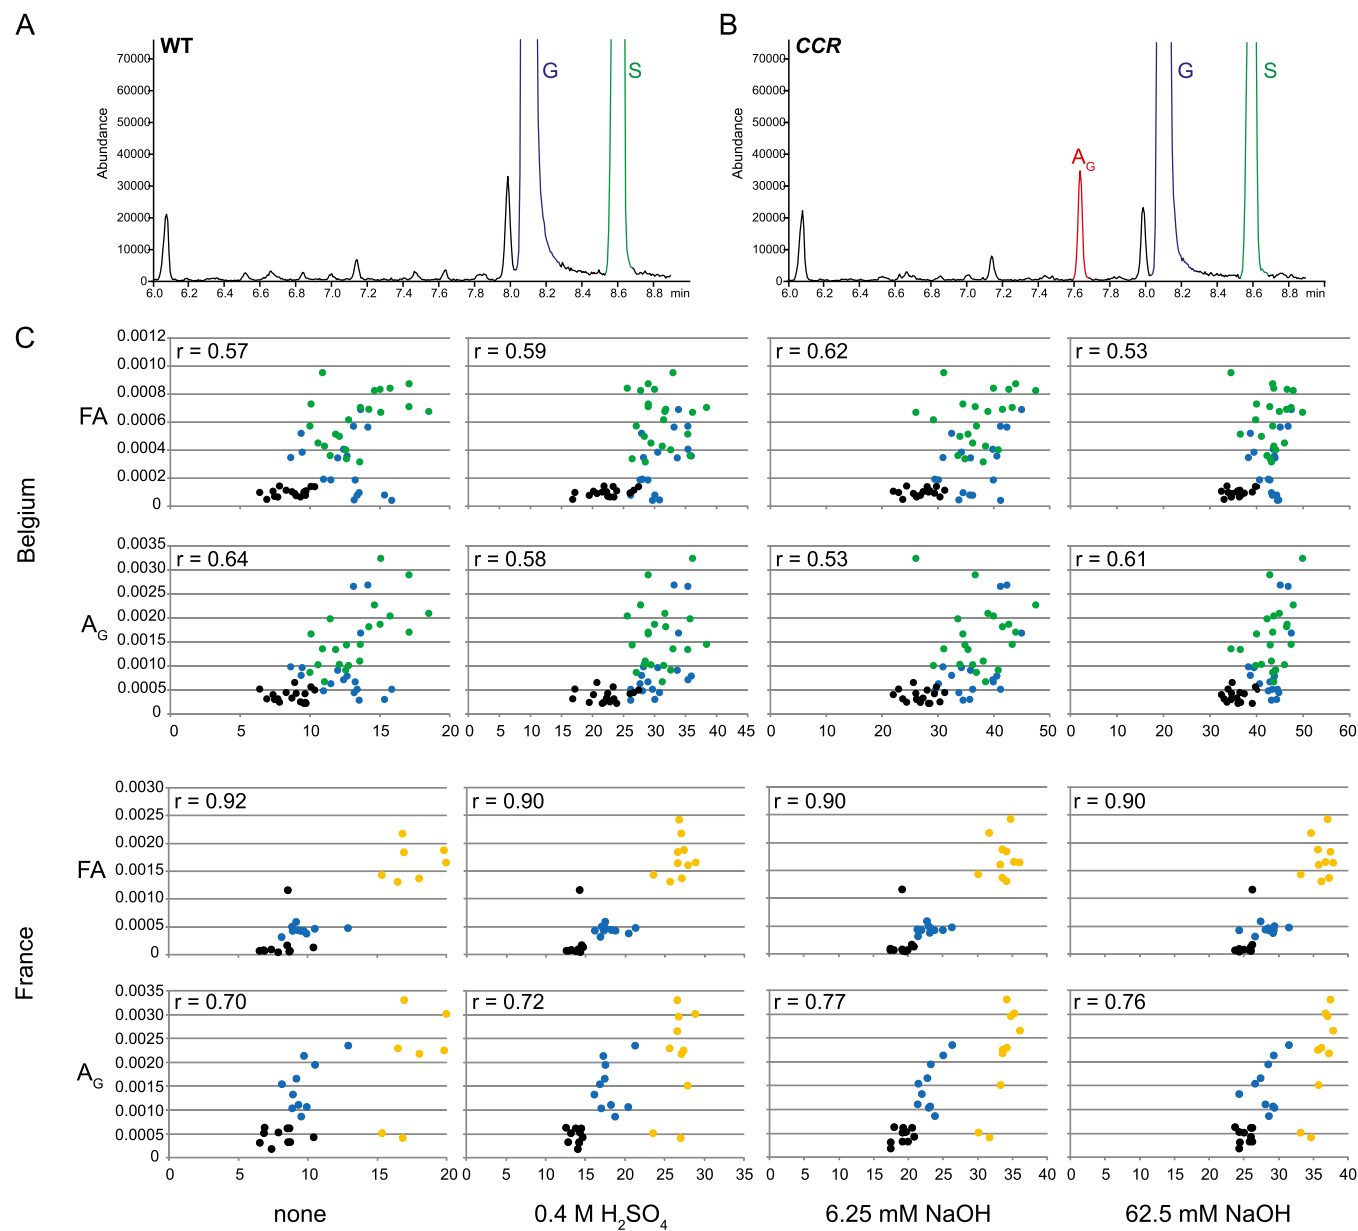

**Fig. S5.** Detection and incorporation of ferulic acid (FA) and the cinnamoyl-CoA reductase (CCR) marker. (A) The CCR marker ( $A_G$ ) was detectable in trace amounts in WT poplar, but (B) was elevated in CCR-down-regulated poplars. (C) The incorporation of FA and the CCR marker into the lignin polymer correlated with the saccharification yield, independently of the applied pretreatment condition. On the y axis of the scatterplots, the peak area, normalized for the internal standard and amount of the cell-wall residue (mg), of FA or  $A_G$  is shown; on the x axis is the saccharification yield, in % dry weight, for the different pretreatment conditions. The Pearson correlation coefficient ( $r$ ) is shown in the left upper corner of each scatterplot. The upper two rows of C correspond to the Belgian field trial, the lower two rows to the French field trial. G, guaiacyl unit; S, syringyl unit; black, WT; blue, FS3; green, FS40; orange, FAS13.

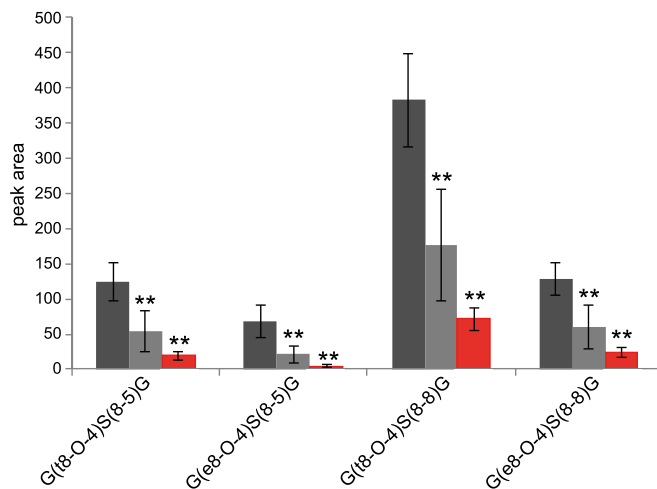

**Fig. S6.** Metabolomics on xylem of field-grown transgenic trees. Metabolite profiling data from red and white scraped xylem of FS3, FS40, and WT from the Belgian field trial. Averaged peak areas for G(8-O-4)S(8-5)G and G(8-O-4)S(8-8)G oligolignols, both *erythro*- and *threo*-isomers. These oligolignols are a few of the most abundant oligolignols present in poplar wood. Red, red xylem from both FS3 and FS40 ( $n = 11$ ); gray, white xylem from both FS3 and FS40 ( $n = 11$ ); black, xylem of WT ( $n = 5$ ).  $**P < 0.01$ .



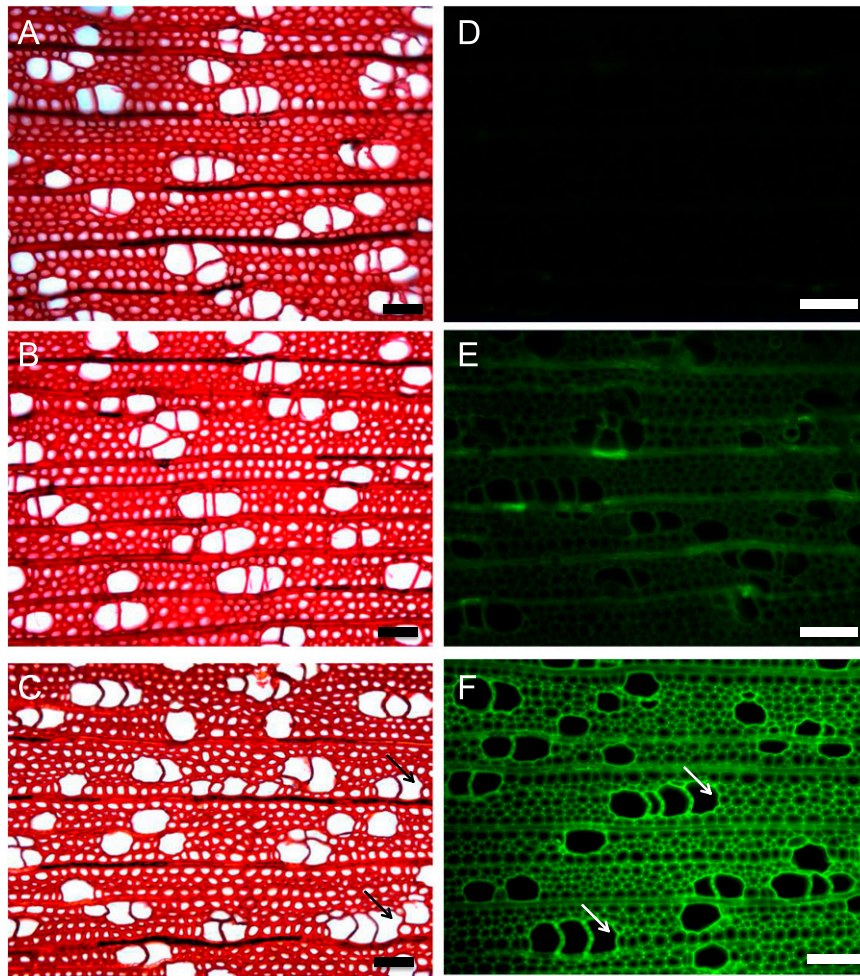

**Fig. S7.** Histochemical phenotyping of FAS13 CCR-down-regulated poplar. Safranin staining of a stem section of field-grown (A) WT and CCR-down-regulated poplar (FAS13) with (B) white-colored xylem and (C) red-colored xylem. Collapsed vessels are mainly present in the red-colored sample (representative examples are indicated with arrows). Blue-excited autofluorescence (450–490 nm) of (D) WT, (E) white-colored xylem of FAS13, and (F) red-colored xylem of FAS13. As already observed in Leplé et al. (1), the autofluorescence was greatly increased in the red-colored xylem and mainly in the cell wall of the vessels and in the middle lamella and/or S1 layers of fibers. White-colored xylem shows a weak autofluorescence in the vessels and fibers but also within ray cells. The collapsed vessels are also visible by blue-excited autofluorescence of the red-colored xylem (F). Exposure time was 675 ms. (Scale bars: 100  $\mu\text{m}$ .)

1. Leplé J-C, et al. (2007) Downregulation of cinnamoyl-coenzyme A reductase in poplar: Multiple-level phenotyping reveals effects on cell wall polymer metabolism and structure. *Plant Cell* 19(11):3669–3691.

**Table S1. Selection of trees for SSF**

| Belgian field trial |         |        |       | French field trial |        |        |        |       |
|---------------------|---------|--------|-------|--------------------|--------|--------|--------|-------|
| Line                | ID_tree | Pooled | Block | Line               | ID1    | ID2    | ID3    | Block |
| FS3                 | K12R11  | a      | 1     | FS3                | L7C61  | L8C59  |        | 1     |
| FS3                 | K10R12  | a      | 1     | FS3                | L14C44 | L14C45 |        | 2     |
| FS3                 | K13R8   |        | 2     | FS3                | L14C31 | L17C30 | L16C31 | 3     |
| FS3                 | K14R26  |        | 3     | FS3                | L8C18  | L9C17  |        | 4     |
| FS3                 | K15R24  |        | 5     | FS3                | L10C10 | L12C13 |        | 5     |
| FS3                 | K11R18  |        | 5     | FS3                | L8C57  | L8C58  |        | 1     |
| FS3                 | K10R21  |        | 6     | FS3                | L14C46 | L16C46 |        | 2     |
| FS40                | K8R19   |        | 4     | FS3                | L15C30 | L14C26 | L16C31 | 3     |
| FS40                | K4R17   |        | 4     | FS3                | L7C16  | L7C19  |        | 4     |
| FS40                | K9R15   |        | 5     | FS3                | L10C8  | L10C11 |        | 5     |
| FS40                | K7R19   |        | 5     | FAS13              | L2C55  | L5C55  | L4C53  | 1     |
| FS40                | K5R23   | b      | 6     | FAS13              | L10C43 | L11C42 |        | 2     |
| FS40                | K5R25   | b      | 6     | FAS13              | L8C28  | L9C30  |        | 3     |
| FS40                | K5R26   |        | 6     | FAS13              | L12C17 | L10C17 |        | 4     |
| WT                  | K10R36  |        | 1     | FAS13              | L14C3  | L15C6  |        | 5     |
| WT                  | K11R29  |        | 2     | FAS13              | L4C54  | L4C52  | L4C53  | 1     |
| WT                  | K10R40  |        | 3     | FAS13              | L11C39 | L11C40 |        | 2     |
| WT                  | K13R34  |        | 4     | FAS13              | L6C26  | L8C31  |        | 3     |
| WT                  | K13R37  |        | 5     | FAS13              | L13C18 | L10C19 |        | 4     |
| WT                  | K15R37  |        | 6     | FAS13              | L14C5  | L16C6  |        | 5     |
|                     |         |        |       | WT                 | L15C57 | L15C61 |        | 1     |
|                     |         |        |       | WT                 | L7C46  | L9C46  |        | 2     |
|                     |         |        |       | WT                 | L13C28 | L13C31 |        | 3     |
|                     |         |        |       | WT                 | L2C18  | L3C18  |        | 4     |
|                     |         |        |       | WT                 | L10C4  | L12C3  |        | 5     |
|                     |         |        |       | WT                 | L15C60 | L16C58 |        | 1     |
|                     |         |        |       | WT                 | L6C45  | L6C47  |        | 2     |
|                     |         |        |       | WT                 | L10C30 | L13C26 |        | 3     |
|                     |         |        |       | WT                 | L4C18  | L4C19  |        | 4     |
|                     |         |        |       | WT                 | L10C5  | L12C2  |        | 5     |

For the Belgian trial, fully red tree samples were selected from over the entire field to minimize environmental (position) effects. For WT, one tree per block was randomly chosen. This selection resulted in six biological repeats for FS3 and WT and seven for FS40. Because a larger amount of material is required for SSF than for saccharification, pooling was necessary from two trees for both transgenic lines, resulting in five biological repeats for FS3 and six for FS40 and WT. The individual trees with the same letter in the column "pooled for SSF" were combined to obtain enough material for SSF analyses. For the French field trial, five fully red trees were selected from each block and saccharified individually, whereas for SSF and wood compositional analysis, they were pooled from two (occasionally three) trees each (ID1, ID2, and ID3), resulting in 10 biological repeats for FS3, FAS13, and WT. Block numbers refer to the tree position in the field (Fig. S2).

**Table S2. Broad-sense heritabilities as a measure of repeatability**

| Country | Trait                        | H <sup>2</sup> |
|---------|------------------------------|----------------|
| Belgium | Height                       | 0.82           |
| Belgium | Diameter                     | 0.77           |
| Belgium | Arabinose                    | 0.78           |
| Belgium | Saccharification stem        | 0.81           |
| Belgium | Saccharification bark        | 0.67           |
| Belgium | Saccharification mix         | 0.84           |
| Belgium | FA                           | 0.90           |
| Belgium | CCR marker (A <sub>G</sub> ) | 0.72           |
| Belgium | H + G + S                    | 0.64           |
| Belgium | Klason lignin                | 0.51           |
| France  | AcBr lignin                  | 0.95           |
| France  | G                            | 0.93           |
| France  | S                            | 0.94           |
| France  | Hemicellulose                | 0.86           |
| France  | Galactose                    | 0.92           |
| France  | Mannose                      | 0.88           |
| France  | Glucose                      | 0.84           |
| France  | FA                           | 0.99           |
| France  | CCR marker (A <sub>G</sub> ) | 0.97           |
| France  | H + G + S                    | 0.99           |
| France  | Klason lignin                | 0.97           |

As a measure of repeatability, broad-sense heritabilities on an entry-mean basis were calculated with the ad hoc approach described (1) for those traits that showed a significant line effect. For the Klason data, H<sup>2</sup> is the equivalent to the coefficient of determination of the linear regression of the line on the observed phenotype.

1. Piepho HP, Möhring J (2007) Computing heritability and selection response from unbalanced plant breeding trials. *Genetics* 177(3):1881–1888.
